# Supplementary material
Source: Research Square preprint supplement (doi:10.21203/rs.3.rs-9858246/v1)
Supplement: Supplementary file 1 [file 3dd765360ae26c56b724b617.docx]

**Supplementary Information**

**Coupled Ionic–Electronic Transport Governs Energy Conversion in Hydrogel Salinity-Gradient Batteries**

Chun-Hao Huang, 1‡ Chia-Fu Chang, 1‡ Bing-Xuan Zhong, 1‡ Phok-Jin Yang,2 Ying-Huang Lai,3 Yi-Qi Yeh,2 Chia-Hsin Wang,2 Lo-Yueh Chang,2 Ying-Rui Lu,2 U-Ser Jeng,2 Chien-Lung Wang,1* Wei-Tsung Chuang, 2*

1 Department of Chemistry, National Taiwan University, No. 1, Sec. 4, Roosevelt Road, Taipei 10617, Taiwan

2 National Synchrotron Radiation Research Center, 101 Hsin-Ann Road, Hsinchu 300092, Taiwan

*3 Department of Chemistry, Tunghai University, No. 1727, Sec. 4, Taiwan Boulevard, Taichung 40704, Taiwan*

‡These authors contributed equally.

Correspondence.

Chien-Lung Wang (kclwang@ntu.edu.tw),

Wei-Tsung Chuang (weitsung@nsrrc.org.tw)


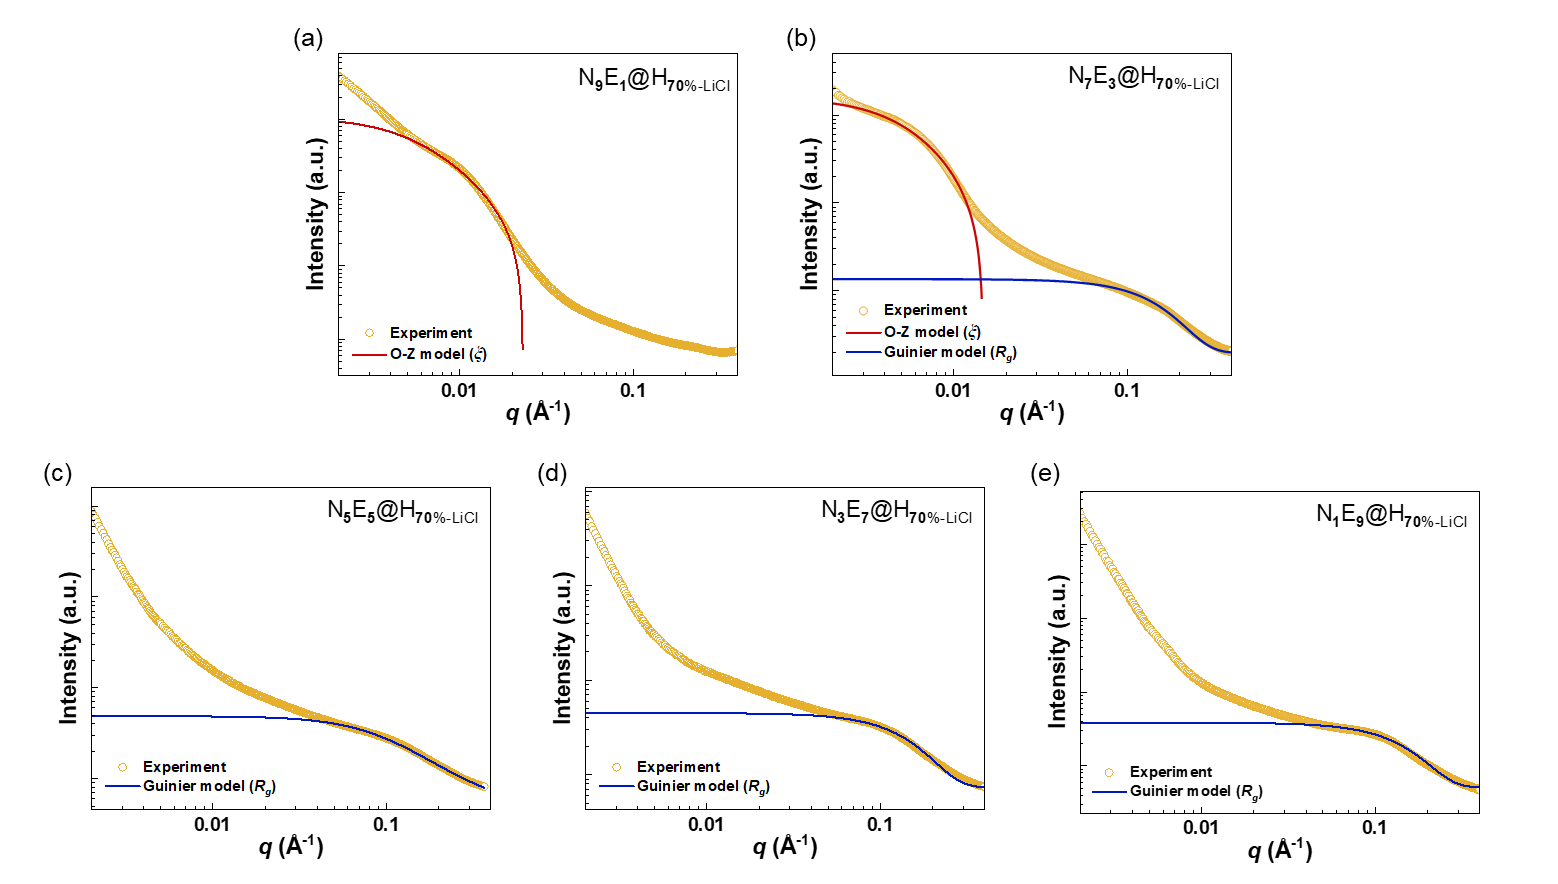


**Supplementary Figure 1.** SAXS profiles of N***x***E***y***@H**70**%-LiCl hydrogels fitted using the Ornstein–Zernike (O–Z) and Guinier models for different monomer ratios (***x*** : ***y***): (a) 9 : 1, (b) 7 : 3, (c) 5 : 5, (d) 3 : 7, (e) 1 : 9.


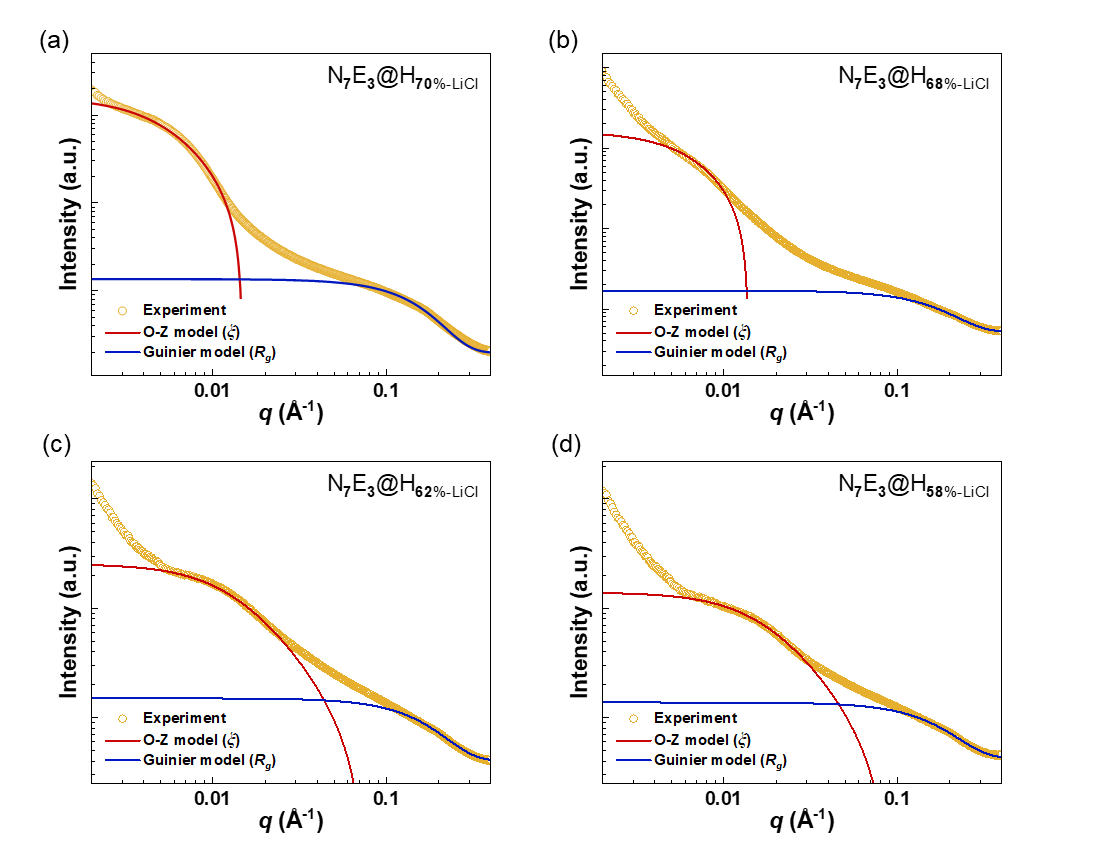


**Supplementary Figure 2.** SAXS profiles of N**7**E**3**@H***w***%-LiCl hydrogels fitted using the Ornstein–Zernike (O–Z) and Guinier models for different water contents (***w*** %): (a) 70 %, (b) 68 %, (c) 62 %, (d) 58 %.


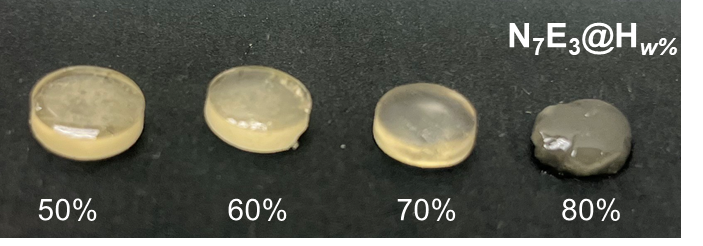


**Supplementary Figure 3.** Photographs of N**7**E**3**@H***w***% hydrogels with different water contents. At ***w*** = 80 %, the sample exhibits a soft, sol-like state.


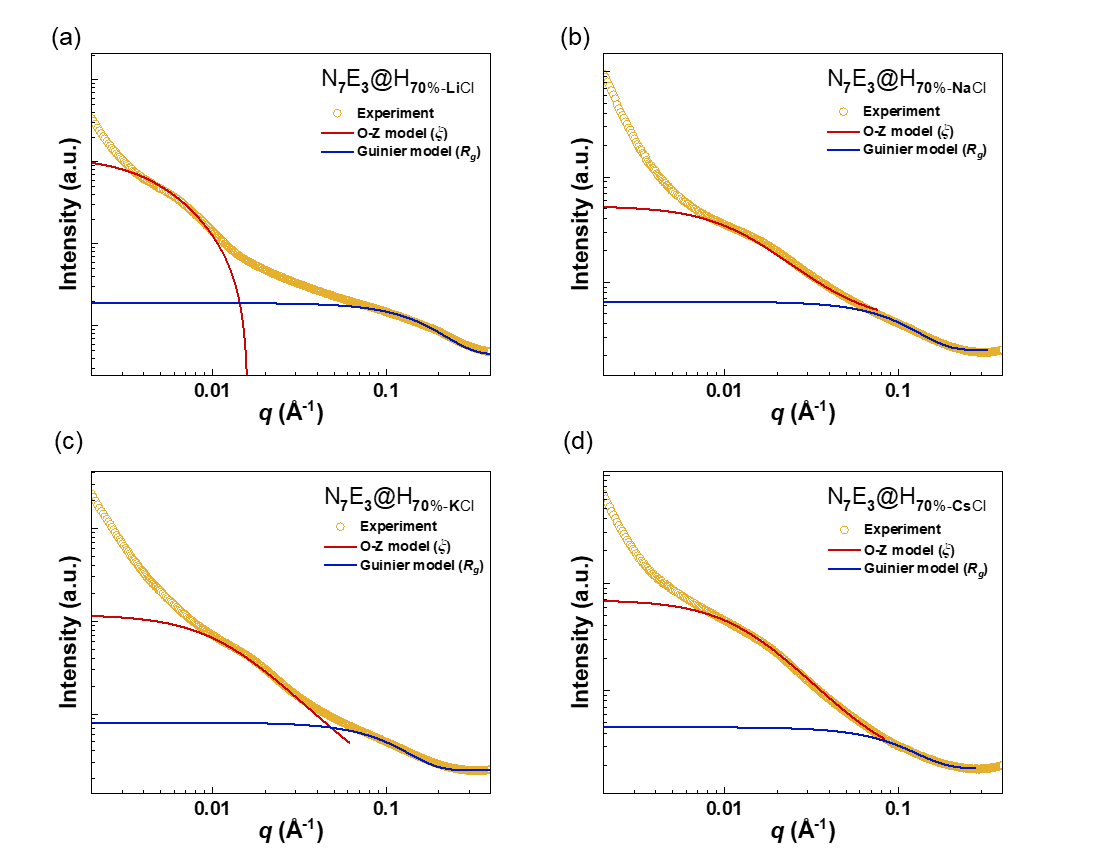


**Supplementary Figure 4.** SAXS profiles of N**7**E**3**@H***w***%-LiCl hydrogels fitted using the Ornstein–Zernike (O–Z) and Guinier models for different alkali metal cations (**A**Cl) (a) LiCl (b) NaCl (c) KCl (d) CsCl.


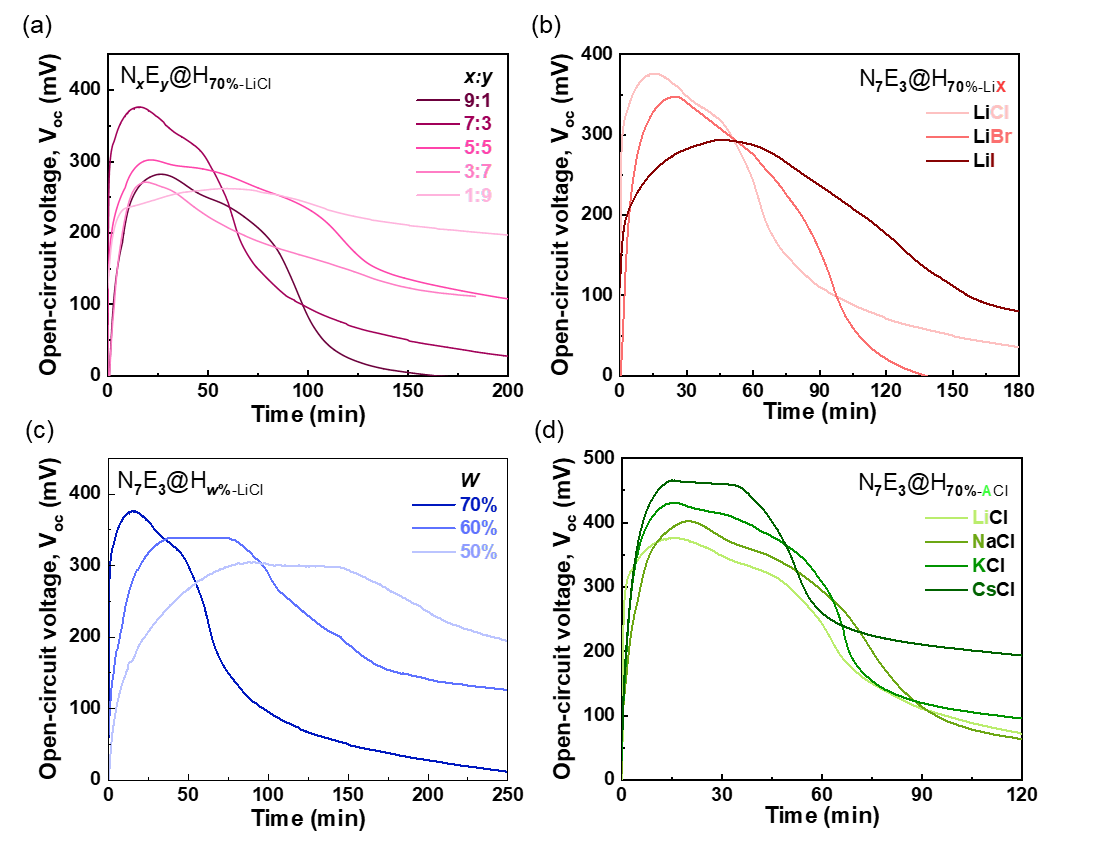


**Supplementary Figure 5.** Representative voltage–time profiles of HSGB devices under different structural and ionic conditions: (a) N***x***E***y***@H**70**%-LiCl hydrogels with different monomer ratios (***x*** : ***y***); (b) N**7**E**3**@H***w***%-LiCl hydrogels with different water contents (***w*** %); (c) N**7**E**3**@H**70**%-Li**X** hydrogels showing the effect of halide anions (**X**⁻= Cl⁻, Br⁻, I⁻); (d) N**7**E**3**@H**70**%-**A**Cl hydrogels illustrating the influence of alkali-metal cations (**A**⁺= Li⁺, Na⁺, K⁺, Cs⁺).


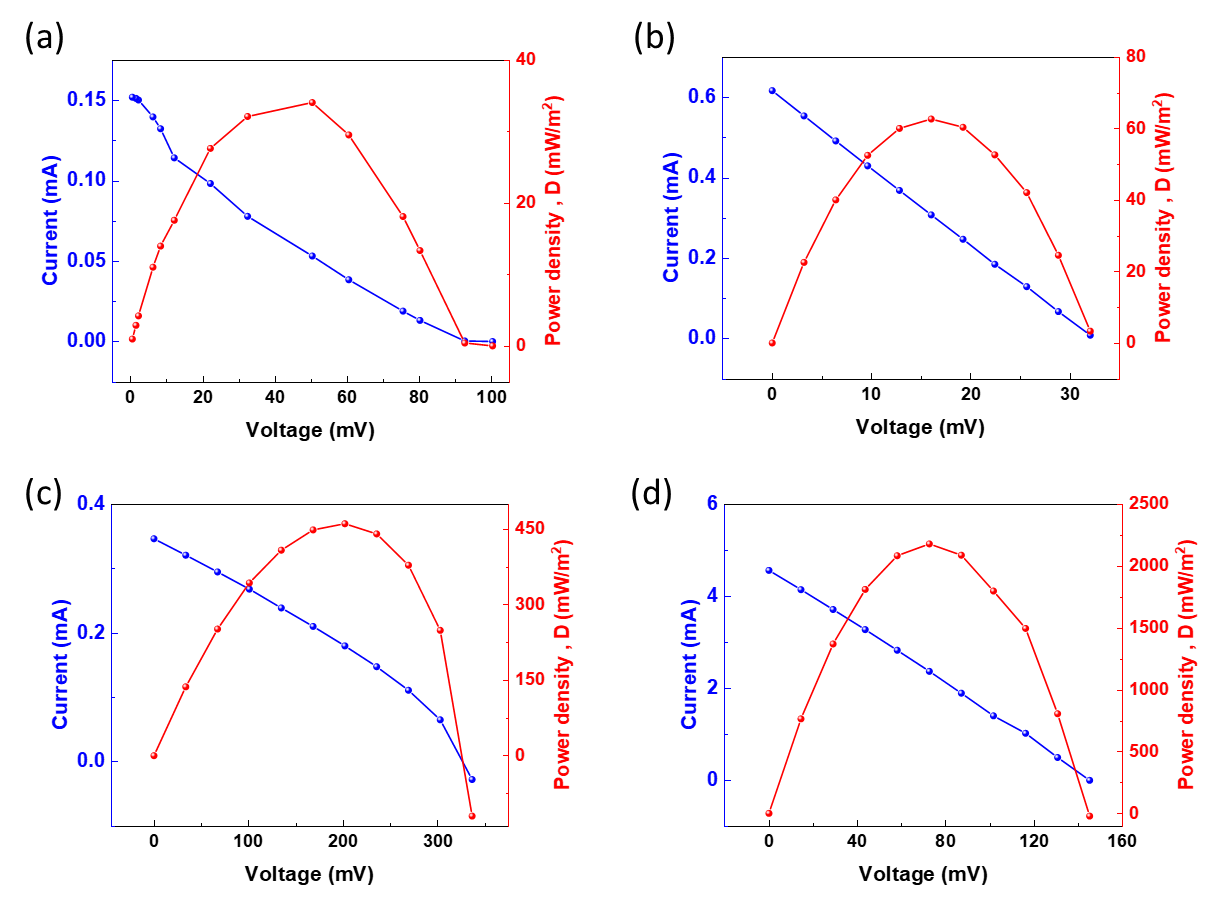


**Supplementary Figure 6.** Representative current–voltage (I–V) curves and power density plots forpaper-based N**7**E**3**@H**70**% HSGB devices with different electrodes: (a) carbon paper (CP), (b) K4[Fe(CN)6]/K3[Fe(CN)6]/CP, (c) PEDOT:PSS/CP, (d) K4[Fe(CN)6]/K3[Fe(CN)6]/PEDOT:PSS/CP.


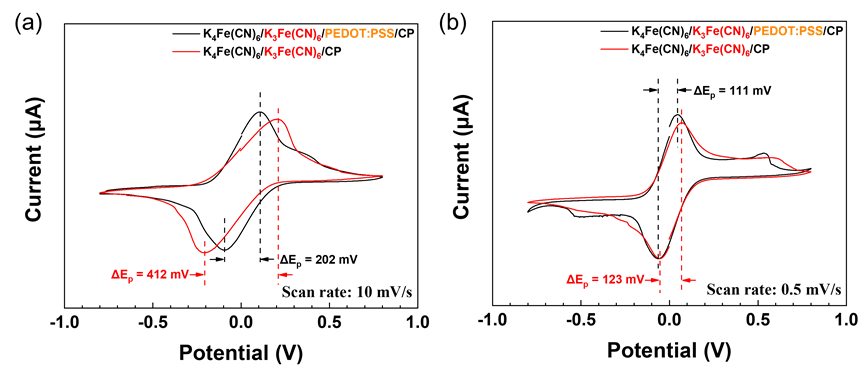


**Supplementary Figure 7.** Cyclic voltammograms recorded at different scan rates of (a) 10 mV/s and (b) 0.5 mV/s, with the peak-to-peak separation (ΔEp) indicated in the figures.


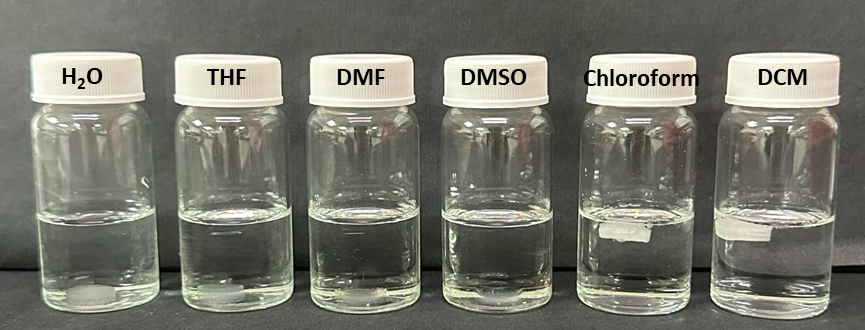


**Supplementary Figure 8.** Solubility assessment of N**7**E**3**@H**70**% hydrogels in water, tetrahydrofuran (THF), *N,N*-dimethylformamide (DMF), dimethyl sulfoxide (DMSO), chloroform, and dichloromethane (DCM).

**Supplementary Figure 9.** Raman spectra of PEGMA monomer, NIPAM monomer, and N**7**E**3**@H**70**% hydrogel, confirming the successful synthesis of the PNIPAM–PEGMA-based bottlebrush polymer hydrogels.


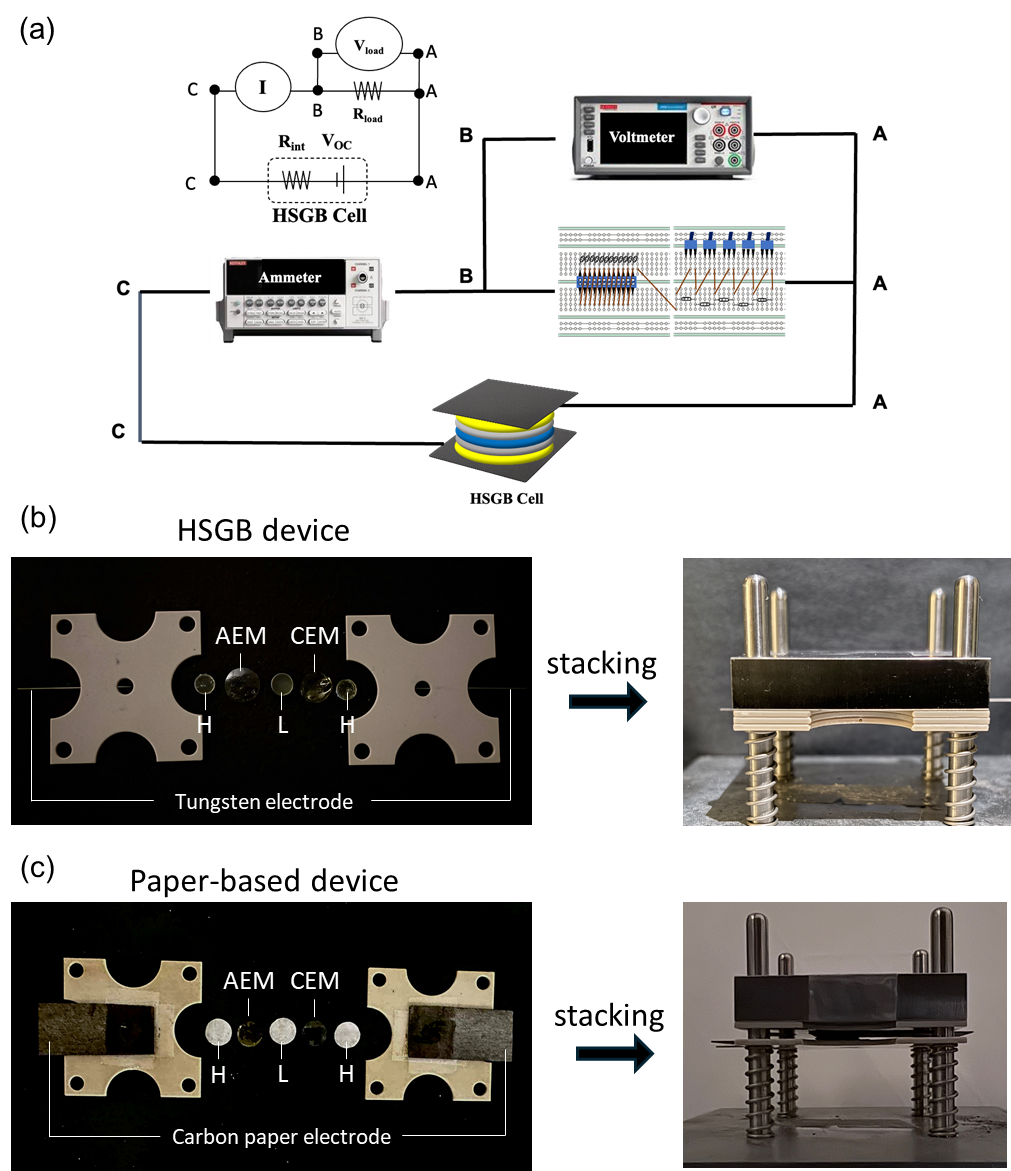


**Supplementary Figure 10.** (a) Equivalent circuit of the HSGB device; (b) photographs of the assembled HSGB components and the complete device; and (c) photographs of the assembled components and complete paper-based HSGB device.

**Supplementary Table 1.** Calculation of free-water fraction by DSC

1. Monomer ratio (***x*** : ***y***)

| Sample |  |  |  |  | Free-water content (%)b | Bound-water content (%)d |
| --- | --- | --- | --- | --- | --- | --- |
| Pure water | 311.02 | 4.90 | 4.90 | 0 | 100 | 0 |
| N**9**E**1**@H**70**% | 259.28 | 1.79 | 1.49 | 0.30 | 83 | 17 |
| N**7**E**3**@H**70**% | 130.14 | 2.16 | 0.90 | 1.26 | 42 | 58 |
| N**5**E**5**@H**70**% | 95.22 | 4.01 | 1.22 | 2.78 | 31 | 69 |
| N**3**E**7**@H**70**% | 89.49 | 2.45 | 0.70 | 1.75 | 28 | 72 |
| N**1**E**9**@H**70**% | 91.73 | 2.89 | 0.85 | 2.04 | 29 | 71 |

1. Water content (***w***%)

| Sample |  |  |  |  | Free-water content (%)b | Bound-water content (%)d |
| --- | --- | --- | --- | --- | --- | --- |
| Pure water | 311.02 | 4.90 | 4.90 | 0 | 100 | 0 |
| N**7**E**3**@H**80**% | 189.72 | 1.90 | 0.61 | 1.29 | 61 | 39 |
| N**7**E**3**@H**70**% | 130.14 | 2.16 | 0.90 | 1.26 | 42 | 58 |
| N**7**E**3**@H**60**% | 49.85 | 1.76 | 0.28 | 1.48 | 16 | 84 |
| N**7**E**3**@H**50**% | 0 | 0.85 | 0 | 0.85 | 0 | 100 |

(c) Anionic effect (Li**X**)

| Sample |  |  |  |  | Free-water content (%)b | Bound-water content (%)d |
| --- | --- | --- | --- | --- | --- | --- |
| Pure water | 311.02 | 4.90 | 4.90 | 0 | 100 | 0 |
| N**7**E**3**@H**70**%-LiCl | 130.14 | 2.16 | 0.90 | 1.26 | 42 | 58 |
| N**7**E**3**@H**70**%-LiBr | 112.32 | 2.98 | 1.08 | 1.90 | 36 | 64 |
| N**7**E**3**@H**70**%-LiI | 73.49 | 3.55 | 0.84 | 2.71 | 24 | 76 |

(d) Cationic effect (**A**Cl)

| Sample |  |  |  |  | Free-water content (%)b | Bound-water content (%)d |
| --- | --- | --- | --- | --- | --- | --- |
| Pure water | 311.02 | 4.90 | 4.90 | 0 | 100 | 0 |
| N**7**E**3**@H**70**%-CsCl | 197.34 | 2.79 | 1.77 | 1.02 | 64 | 36 |
| N**7**E**3**@H**70**%-KCl | 186.78 | 2.21 | 1.33 | 0.88 | 60 | 40 |
| N**7**E**3**@H**70**%-NaCl | 179.62 | 2.93 | 1.58 | 1.35 | 53 | 47 |
| N**7**E**3**@H**70**%-LiCl | 130.14 | 2.16 | 0.90 | 1.26 | 42 | 58 |

a

bFree water content (%)=

c

dBound water content (%)=

= gel weight

= total water weight

= free-water weight

= nonfree-water weight

= bound-water weight

= melting enthalpy of gels

= melting enthalpy of water

**Supplementary Table 2.** Hydration enthalpies of representative ions, as reported in reference 38.

| Cations |  | Anions |  |
| --- | --- | --- | --- |
| Li+ | －531.4 | Cl－ | －351.5 |
| Na+ | －422.6 | Br－ | －318.0 |
| K+ | －338.9 | I－ | －280.3 |
| Cs+ | －280.3 |  |  |

**Supplementary Table 3.** Summary of electrochemical performance parameters for the paper-based HSGB devices with different electrodes (carbon paper (CP), K4[Fe(CN)6]/K3[Fe(CN)6]/CP, PEDOT:PSS/CP, K4[Fe(CN)6]/K3[Fe(CN)6]/PEDOT:PSS/CP).

| Electrode | VOC (mV) | ISC (mA) | Pmaxa (x10-3 mW) | Dmaxa (mW/m2) | Dmaxb (mW/m2) |
| --- | --- | --- | --- | --- | --- |
| Carbon Paper (CP) | 106 ± 4.5 | 0.143 ± 0.007 | 2.69 ± 0.04 | 34.2 ± 0.5 | 48.0 ± 2.1 |
| K4[Fe(CN)6]/K3[Fe(CN)6]/CP | 37 ± 5.6 | 0.58 ± 0.04 | 5.4 ± 0.5 | 69±6 | 68 ± 5.6 |
| PEDOT:PSS/CP | 289 ± 44 | 0.38 ± 0.03 | 35.9 ± 2.1 | 457±27 | 347 ± 35 |
| K4[Fe(CN)6]/K3[Fe(CN)6]/PEDOT:PSS/CP | 149 ± 3.9 | 4.51 ± 0.45 | 161 ± 12 | 2050 ± 150 | 2129 ± 178 |

ᵃ The experimental maximum power (Pmax​) and maximum power density (Dmax) were determined from the peak of the power–voltage (P–V) curve, as shown in Figure S6, where P = I × V. The power density was calculated by dividing Pmax by the device’s active area.

ᵇ The theoretical maximum power density was calculated using a simplified linear resistor model (assuming constant internal resistance) according to the equation: Dmax​=(Voc×Isc​)/(4×A).
